# Supplementary material
Source: publisher figshare collection journal article supplement (https://sage.figshare.com/ndownloader/files/22256748)
Supplement: Supplementary file 1 [file 22256748]

## Appendix A

## Semi-structured Focus Group Questions

**Good behavior:**

1. What are some things about parenting that you like the most?
2. When your child does something good, how do you let them know that you're happy with what they've done?

**Poor behavior:**

3. So we all know that children are not *always* good, so what are some of the hard parts of being a parent?
4. Some of you mentioned your children's poor behavior, and we all know that all children get like that. So what do you do when your child does something wrong, what methods do you use to correct their behavior?
5. Do you do different things depending on what they did wrong?
  - a. What are some examples? (e.g., disobeying, disrespectful, bad grades, lying, cheating, fighting with siblings, misbehaving)
6. Do you treat your children differently, based on different situations (e.g., child's age, gender, personality, or where you are)?
  - a. Why?
7. How do you feel before, during, and after deal with your child do something wrong? Do you feel differently depending on how you've tried to correct their behavior?

**Influences on parenting:**

8. What are some of the reasons that made you decide how you want to correct your children's behavior in these ways?
  - a. How were you treated when you got in trouble as a child?
  - b. Do most of your friends teach their children to do the right thing in similar ways as you?
  - c. Have you changed the way you teach your child/children when gotten in trouble over time? Why?
  - d. [For G1 Taiwanese American Mothers] Did coming to the U.S. change how you decided to correct your children's poor behavior? In what ways?

**Cultural differences:**

9. How do you think that parents in Taiwan and the U.S. are similar or different in the ways that they treat their children when they get in trouble?

**Other individuals:**

10. Are there any other members in your household that also correct your children's behavior? Who are they?
  - a. How are their methods similar or different from yours?

## Appendix B

## Closing Questionnaire

Thank you so much for participating in this study!

We understand that during these interviews you may have felt uncomfortable with sharing your experiences, or you may have remembered additional details regarding your experiences due to something that another individual said. We are providing you an opportunity to share with us any additional details that may have been left out during the group interviews.

1. If you were uncomfortable with sharing or forgot any details regarding *what some of the methods are that you use with your child when he/she gets in trouble, or how this varies based on child characteristics, location, or behavior, please write them here:*
  
  
  
  
  
  
  
  
  
  
2. If you were uncomfortable with sharing or forgot any details regarding *what some of the reasons that made you decide how you want to deal with your child when he/she gets in trouble, please write them here:*
  
  
  
  
  
  
  
  
  
  
3. If you were uncomfortable with sharing or forgot any details regarding *how you feel before, during, and after you deal with your child when they get in trouble, or if you feel differently depending on the method of dealing with your child, please write them here:*

Also, please let us know about what your general experience participating in this group interview was like and provide any additional comments for us regarding your experience here:

Thank you so much for your time and participation!
